# Supplementary material for: Synaptic input sequence discrimination on behavioral timescales mediated by reaction-diffusion chemistry in dendrites
Source: eLife journal article supplement (doi:10.7554/elife.25827), 2017-04-19
Supplement: supp [file elife-25827-supp-v1.zip]

## Supplementary Material

Chemical model: Reduced MAPK system. All volumes are initial reference volumes, and are rescaled to actual volumes defined by detailed morphology of simulated neuron and subsequent spatial discretization for solving PDEs.

|                             |                                          |                        |                        |
|-----------------------------|------------------------------------------|------------------------|------------------------|
| PSD                         | Vol = 0.01 fl                            |                        |                        |
| Reactions                   | Kf                                       | Kb                     |                        |
| Ca_input <====> Ca          | 500 s <sup>-1</sup>                      | 10 s <sup>-1</sup>     |                        |
| CaM-Ca3 + Ca <====> CaM-Ca4 | 1.8 uM <sup>-1</sup> .s <sup>-1</sup>    | 10 s <sup>-1</sup>     |                        |
| CaM + Ca <====> CaM-Ca      | 8.4846 uM <sup>-1</sup> .s <sup>-1</sup> | 8.4853 s <sup>-1</sup> |                        |
| CaM-Ca2 + Ca <====> CaM-Ca3 | 3.6001 uM <sup>-1</sup> .s <sup>-1</sup> | 10 s <sup>-1</sup>     |                        |
| CaM-Ca + Ca <====> CaM-Ca2  | 8.4846 uM <sup>-1</sup> .s <sup>-1</sup> | 8.4853 s <sup>-1</sup> |                        |
|                             |                                          |                        |                        |
| Pools                       |                                          |                        |                        |
| name                        | Initial Concen                           | buffered               | D (μm <sup>2</sup> /s) |
| Ca                          | 0.1 uM                                   | No                     | 100                    |
| Ca_input                    | 0.08 uM                                  | Yes                    | 0                      |
| CaM                         | 40 uM                                    | No                     | 0.5                    |
| CaM-Ca3                     | 0 uM                                     | No                     | 1                      |
| CaM-Ca2                     | 0 uM                                     | No                     | 1                      |
| CaM-Ca                      | 0 uM                                     | No                     | 1                      |
| CaM-Ca4                     | 0 uM                                     | No                     | 1                      |
|                             |                                          |                        |                        |
| Spine Head                  | Vol = 0.09 fl                            |                        |                        |
| Reactions                   | Kf                                       | Kb                     |                        |
| CaM-Ca3 + Ca <====> CaM-Ca4 | 1.8 uM <sup>-1</sup> .s <sup>-1</sup>    | 10 s <sup>-1</sup>     |                        |
| CaM + Ca <====> CaM-Ca      | 8.4845 uM <sup>-1</sup> .s <sup>-1</sup> | 8.4853 s <sup>-1</sup> |                        |
| CaM-Ca2 + Ca <====> CaM-Ca3 | 3.6001 uM <sup>-1</sup> .s <sup>-1</sup> | 10 s <sup>-1</sup>     |                        |
| CaM-Ca + Ca <====> CaM-Ca2  | 8.4845 uM <sup>-1</sup> .s <sup>-1</sup> | 8.4853 s <sup>-1</sup> |                        |
| CaM <====> CaM_xchange      | 1 s <sup>-1</sup>                        | 100 s <sup>-1</sup>    |                        |
|                             |                                          |                        |                        |
| Pools                       |                                          |                        |                        |
| name                        | InitialConc                              | buffered               | D (μm <sup>2</sup> /s) |
| Ca                          | 0.11111 uM                               | No                     | 100                    |
| CaM                         | 40 uM                                    | No                     | 0.5                    |
| CaM-Ca3                     | 0 uM                                     | No                     | 1                      |
| CaM-Ca2                     | 0 uM                                     | No                     | 1                      |
| CaM-Ca                      | 0 uM                                     | No                     | 1                      |
| CaM-Ca4                     | 0 uM                                     | No                     | 1                      |
| CaM_xchange                 | 0 uM                                     | No                     | 20                     |
|                             |                                          |                        |                        |
| Dendrite                    | Vol = 1 fl                               |                        |                        |
| Reactions                   | Kf                                       | Kb                     |                        |
| AA <====> APC               | 0.4 s <sup>-1</sup>                      | 0.01 s <sup>-1</sup>   |                        |
| 2 Ca + Raf <====> act_Raf   | 12 uM <sup>-2</sup> .s <sup>-1</sup>     | 4 s <sup>-1</sup>      |                        |

|                                                |                                          |                        |                        |
|------------------------------------------------|------------------------------------------|------------------------|------------------------|
| K_A_p <===> K_A                                | 0.05 s <sup>-1</sup>                     | 0 s <sup>-1</sup>      |                        |
| 2 AA + PKC <===> act_PKC                       | 1 uM <sup>-2</sup> .s <sup>-1</sup>      | 2 s <sup>-1</sup>      |                        |
| Ca_input <===> Ca                              | 500 s <sup>-1</sup>                      | 10 s <sup>-1</sup>     |                        |
| reg_phosphatase <===> inact_phosphatase        | 0.03 s <sup>-1</sup>                     | 0 s <sup>-1</sup>      |                        |
| CaM-Ca3 + Ca <===> CaM-Ca4                     | 1.8 uM <sup>-1</sup> .s <sup>-1</sup>    | 10 s <sup>-1</sup>     |                        |
| CaM + Ca <===> CaM-Ca                          | 8.4846 uM <sup>-1</sup> .s <sup>-1</sup> | 8.4853 s <sup>-1</sup> |                        |
| CaM-Ca2 + Ca <===> CaM-Ca3                     | 3.6 uM <sup>-1</sup> .s <sup>-1</sup>    | 10 s <sup>-1</sup>     |                        |
| CaM-Ca + Ca <===> CaM-Ca2                      | 8.4846 uM <sup>-1</sup> .s <sup>-1</sup> | 8.4853 s <sup>-1</sup> |                        |
| CaM <===> CaM_xchange                          | 10 s <sup>-1</sup>                       | 10 s <sup>-1</sup>     |                        |
|                                                |                                          |                        |                        |
| Enzyme-reactions                               | Km                                       | kcat                   | ratio                  |
| P_MAPK ---phosphatase--> MAPK                  | 0.02 uM                                  | 1 s <sup>-1</sup>      | 4                      |
| APC ---P_MAPK--> AA                            | 5 uM                                     | 10 s <sup>-1</sup>     | 4                      |
| K_A ---P_MAPK--> K_A_p                         | 10 uM                                    | 10 s <sup>-1</sup>     | 4                      |
| inact_phosphatase ---P_MAPK--> reg_phosphatase | 1 uM                                     | 0.1 s <sup>-1</sup>    | 4                      |
| MAPK ---act_PKC--> P_MAPK                      | 5 uM                                     | 10 s <sup>-1</sup>     | 4                      |
| MAPK ---act_Raf--> P_MAPK                      | 20.001 uM                                | 10 s <sup>-1</sup>     | 4                      |
| P_MAPK ---reg_phosphatase--> MAPK              | 0.099998 uM                              | 2 s <sup>-1</sup>      | 4                      |
|                                                |                                          |                        |                        |
| Pools                                          |                                          |                        |                        |
| name                                           | Initial Concen                           | buffered               | D (μm <sup>2</sup> /s) |
| phosphatase                                    | 0.4 uM                                   | No                     | 1                      |
| P_MAPK                                         | 0 uM                                     | No                     | 1                      |
| MAPK                                           | 2 uM                                     | No                     | 1                      |
| AA                                             | 0 uM                                     | No                     | 1                      |
| act_PKC                                        | 0 uM                                     | No                     | 0                      |
| PKC                                            | 1 uM                                     | No                     | 1                      |
| APC                                            | 1 uM                                     | Yes                    | 0                      |
| K_A                                            | 1 uM                                     | No                     | 0                      |
| Raf                                            | 1.4 uM                                   | No                     | 0                      |
| act_Raf                                        | 0 uM                                     | No                     | 0                      |
| Ca                                             | 0.08 uM                                  | No                     | 100                    |
| Ca_input                                       | 0.08 uM                                  | Yes                    | 0                      |
| K_A_p                                          | 0 uM                                     | No                     | 0                      |
| inact_phosphatase                              | 1 uM                                     | No                     | 1                      |
| reg_phosphatase                                | 0 uM                                     | No                     | 1                      |
| CaM                                            | 2 uM                                     | No                     | 0.5                    |
| CaM-Ca3                                        | 0 uM                                     | No                     | 1                      |
| CaM-Ca2                                        | 0 uM                                     | No                     | 1                      |
| CaM-Ca                                         | 0 uM                                     | No                     | 1                      |
| CaM-Ca4                                        | 0 uM                                     | No                     | 1                      |
| CaM_xchange                                    | 0 uM                                     | No                     | 20                     |
|                                                |                                          |                        |                        |

Electrical model: V in mV, referenced to resting potential. Time in ms.

Ion channel definitions, mostly from Traub, Wong, Miles, and Richardson. 1991. J. Neurophysiol 66:635-650.

$$g_{Ca} = g_{maxCa} \cdot s^2 \cdot r$$

$$E_{Ca} = 140$$

$$s\text{-gate: } \alpha = \frac{1.6}{1 + \exp(-0.072(V - 65))}$$

$$\beta = \frac{0.02(V - 51.1)}{\exp\left(\frac{V - 51.1}{5}\right) - 1}$$

$$r\text{-gate for } V \leq 0: \alpha = 0.005$$

$$\beta = 0.0$$

$$r\text{-gate for } V > 0: \alpha = \frac{\exp\left(\frac{-V}{20}\right)}{200}$$

$$\beta = 0.005 - \alpha$$

$$g_{Na} = g_{maxNa} \cdot m^2 \cdot h$$

$$E_{Na} = 115$$

$$m\text{-gate: } \alpha = \frac{0.32(13.1 - V)}{\exp\left(\frac{13.1 - V}{4}\right) - 1}$$

$$\beta = \frac{0.28(V - 40.1)}{\exp\left(\frac{V - 40.1}{5}\right) - 1}$$

$$h\text{-gate: } \alpha = 0.128 \exp\left(\frac{17 - V}{18}\right)$$

$$\beta = \frac{4}{1 + \exp\left(\frac{40 - V}{5}\right)}$$

$$g_{KDR} = g_{maxKDR} \cdot n$$

$$E_{KDR} = -15$$

$$n\text{-gate: } \alpha = \frac{0.016(35.1 - V)}{\exp\left(\frac{35.1 - V}{5}\right) - 1}$$

$$\beta = 0.25 \exp\left(\frac{20 - V}{40}\right)$$

$$g_{KAHP} = g_{maxKAHP} \cdot q$$

$$E_{KAHP} = -15$$

$$q\text{-gate: } \alpha = \min(20 \times 10^{-6} [Ca], 0.01)$$

$$\beta = 0.001$$

$$g_{KA} = g_{maxKA} \cdot a \cdot b$$

$$E_{KA} = -15$$

$$a\text{-gate: } \alpha = \frac{0.02(13.1 - V)}{\exp\left(\frac{13.1 - V}{10}\right) - 1}$$

$$\beta = \frac{0.0175(V - 40.1)}{\exp\left(\frac{V - 40.1}{10}\right) - 1}$$

$$b\text{-gate: } \alpha = 0.0016 \exp\left(\frac{-13 - V}{18}\right)$$

$$\beta = \frac{0.05}{1 + \exp\left(\frac{10.1 - V}{5}\right)}$$

$$g_{KC} = g_{maxKC} \cdot c$$

$$E_{KC} = -15$$

$$c\text{-gate for } V \leq 50: \alpha = \frac{\exp\left(\frac{V - 10}{11} - \frac{V - 6.5}{27}\right)}{18.975} \quad \beta = 2 \exp\left(\frac{6.5 - V}{27}\right)$$

$$c\text{-gate for } V > 50: \alpha = 2 \exp\left(\frac{6.5 - V}{27}\right)$$

$$\beta = 0$$

$$g_{GluR} = \frac{A \cdot g_{maxGluR}}{\tau_1 - \tau_2} (\exp(-t/\tau_1) - \exp(-t/\tau_2)) \quad \text{where}$$

A = normalization constant such that  $g_{GluR} = g_{maxGluR}$  at peak, and

$$\tau_1 = 2$$

$$\tau_2 = 9$$

$$g_{GABAR} = \frac{A \cdot g_{maxGABAR}}{\tau_1 - \tau_2} (\exp(-t/\tau_1) - \exp(-t/\tau_2)) \quad \text{where}$$

A = normalization constant such that  $g_{GABAR} = g_{maxGABAR}$  at peak, and

$$\tau_1 = 4$$

$$\tau_2 = 9$$

$$g_{NMDAR} = \frac{g_{maxNMDAR}}{\tau} \exp(-t/\tau) \frac{K_{Mg}}{K_{Mg} + [Mg]} \quad \text{where}$$

$$K_{Mg} = \exp((V - E_{rest})\gamma) / \eta \quad \tau = 20$$

$$\gamma = 0.28 \quad \eta = 62$$

$$I_{NMDAR_{Ca}} = g_{NMDAR} \cdot Ca_{frac} \cdot \ln([Ca_{out}]/[Ca_{in}]) \cdot V \cdot \frac{[Ca_{in}] - \varphi[Ca_{out}]}{(1-\varphi)([Ca_{in}] - [Ca_{out}])} \text{ where}$$

$$\varphi = \exp(-VFz/RT)$$

$$z = 2$$

$$T = 300 \text{ Kelvin}$$

$$[Ca_{out}] = 1.5 \text{ mM}$$

$$F = 96485 \text{ sA/mol}$$

$$R = 8.314 \text{ J/(K.mol)}$$

$$Ca_{frac} = \text{fraction of current carried at 0 mV by Ca} = 0.02$$

$$[Ca_{in}] = 0.08 \text{ } \mu\text{M}$$

Calcium pools:

$$d[Ca]/dt = \phi(I_{Ca} + Ca_{NMDA}) - [Ca]/13.33$$

Passive properties

$$RM = 1.0 \text{ } \Omega \cdot m^2$$

$$RA = 1.0 \text{ } \Omega \cdot m$$

$$CM = 0.01 \text{ F/m}^2$$

$$E_{rest} = -60 \text{ mV.}$$

Channel distributions

| Channel | Zone           | Distribution, i.e., Gmax. (S/m <sup>2</sup> ) |
|---------|----------------|-----------------------------------------------|
| Ca      | Basal + Apical | 0.0 Also tested 4.0                           |
| Ca      | Soma           | 40                                            |
| Na      | Basal          | 60                                            |
| Na      | Apical         | 40+40exp(-p/200)                              |
| Na      | Soma           | 600                                           |
| K_DR    | Basal          | (p<400)*200                                   |
| K_DR    | Apical         | 60+40exp(p<125)                               |
| K_DR    | Soma           | 250                                           |
| K_AHP   | All            | 8                                             |
| K_C     | Basal + Apical | 50+150exp(-p/200)                             |
| K_C     | Soma           | 100                                           |
| K_A     | Basal + Apical | 50(1+2/(dia+0.1))                             |
| K_A     | Soma           | 50                                            |
| GABA    | All            | 10+30(p < 125)                                |
| GluR    | Spine Heads    | 4000                                          |
| NMDAR   | Spine Heads    | 800 (Tested wide range)                       |

Where p = path length measured along dendrite, from soma to specified point on dendritic tree, and

dia = diameter of dendrite at specified point on dendritic tree.
