# Supplementary figures and images for: Synaptic input sequence discrimination on behavioral timescales mediated by reaction-diffusion chemistry in dendrites
Source: eLife journal article supplement (doi:10.7554/elife.25827), 2017-04-19

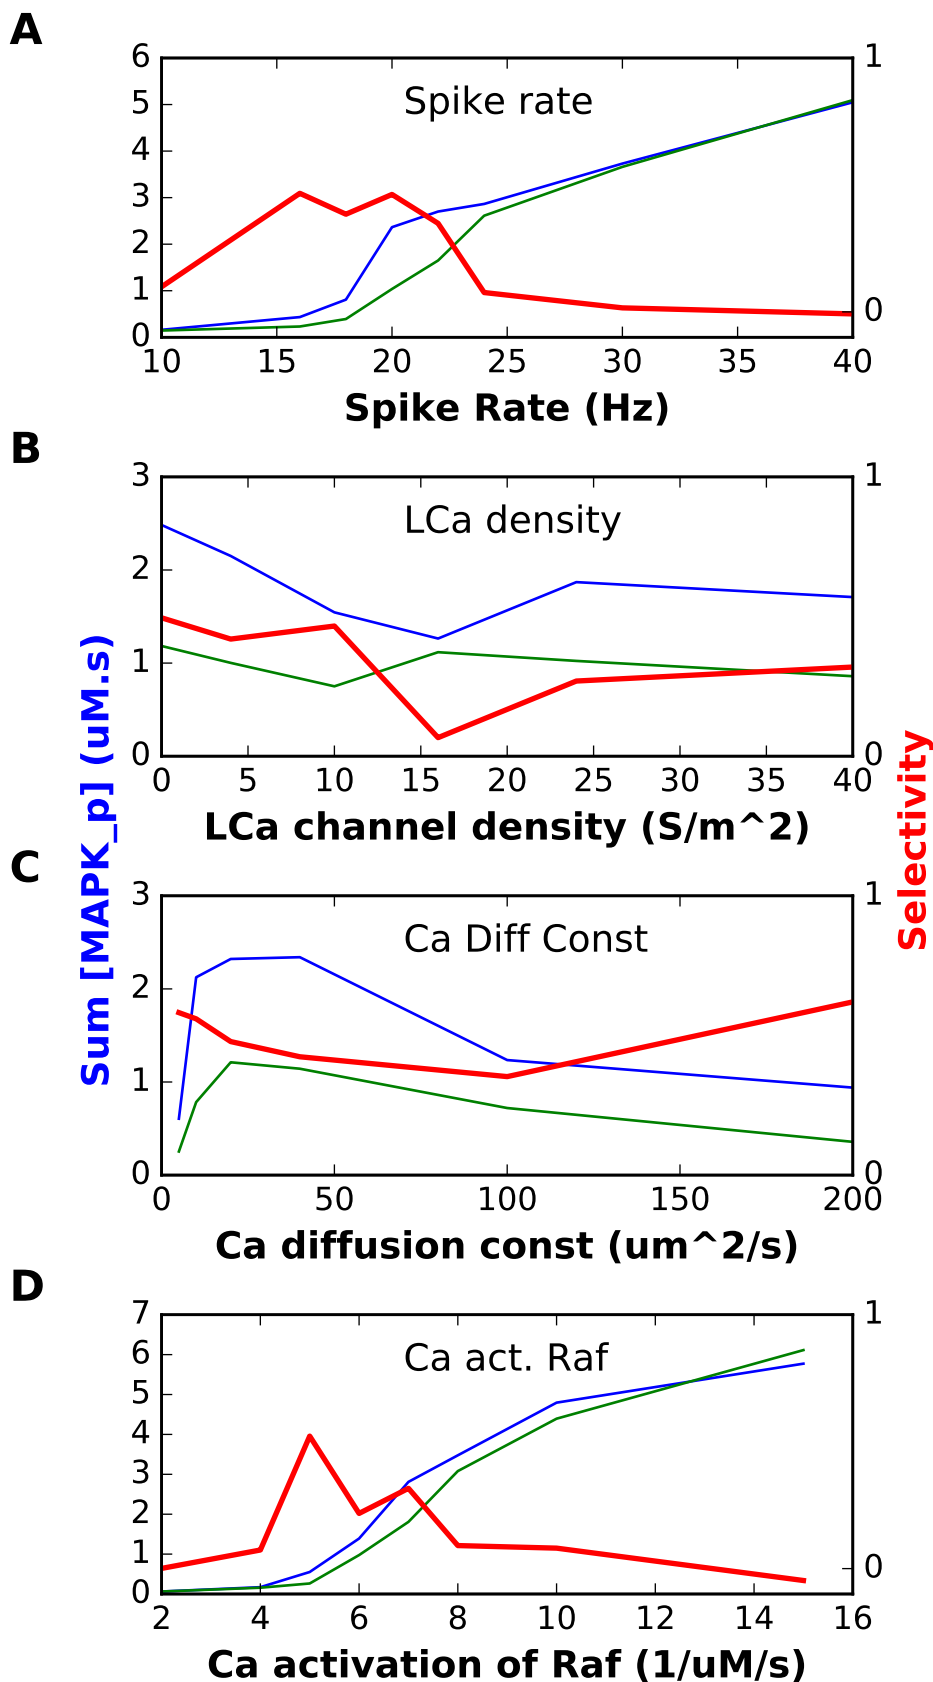

Supplement: supp [file elife-25827-supp-v1.zip]
